# Supplementary material
Source: PubMed Central journal article supplement (PMC7702214)
Supplement: NIHMS1645695-supplement-1.pdf [file NIHMS1645695-supplement-1.pdf]

## Supplementary Material

### Methods

**Study design.** We conducted and reported a systematic review following the recommendation of the Preferred Reporting Items for Systematic Reviews and Meta-Analyses (PRISMA) statement.<sup>16</sup> Details of the protocol for this systematic review were registered on PROSPERO (registration #CRD42019125508).<sup>17</sup>

**Search strategy.** We searched the following databases from the inception until February 12, 2019: Embase (Elsevier) and PubMed. The search was developed with the help of an experienced librarian (KMH). Studies were excluded if they were review articles, editorials, non-English, animal studies, modeling studies, cost-analysis studies, qualitative studies, case studies, systematic reviews/meta-analyses, did not include individuals younger than age 50, had a sample size of <100 subjects, focused only on a special population (eg, composed solely of patients with a history of radiation for cancer therapy or patients with genetic cancer syndrome), or included only children younger than age 18. Autopsy studies were included if they answered any of the key questions. Additional records were identified through review of the reference sections of included studies and reviewed in full text if they met title and abstract review criteria.

**Selection criteria.** Two individuals (NE, MYC) independently reviewed identified abstracts for eligibility. All abstracts reporting original adenoma and/or CRC prevalence data with specified subgroup of 18–49 years were selected for full-text review. If the age range of the study population was not specified in the abstract, the abstract was also selected for review to determine whether the age group 18–49 years was listed as a subgroup in the article. Disagreements were resolved by involving a third author (SG). The same 2 reviewers then conducted a full-text review of articles that met the inclusion criteria and of articles for which there was some uncertainty as to eligibility.

We included cohort studies conducted in adults 18–49 years of age, undergoing colonoscopy (or autopsy), and reporting (1) prevalence of adenoma, (2) risk factors associated with adenoma, (3) risk of metachronous advanced neoplasia and/or CRC, and/or (4) impact of CRC surveillance in subset of patients with adenoma on long-term incidence and mortality from CRC. If there were articles based on overlapping study participants, the original authors were contacted to help determine which article to include.

**Data abstraction and risk of bias assessment.** Two individuals (NE, MYC) conducted data abstraction. Data abstraction included study characteristics such as author, year of publication, study design/setting (single center vs multicenter, cohort vs randomized trial), time period of colonoscopy, the inclusion and exclusion criteria for each study, the mean age of the study population, and the

total sample size. Outcome data abstracted included the number of adenomas for each study, risk factors for YOA and their respective ORs from multivariate analysis, the number of patients with YOA receiving follow-up colonoscopy, the proportion of individuals with baseline adenoma with advanced neoplasia on follow-up, and the proportion of individuals with baseline adenoma with CRC on follow-up. If a study also included data on adults 50 and older, we limited our data abstraction to adenoma data for adults aged 18–49.

The same 2 individuals (NE, MYC) individually assessed each included article for quality. The 2017 Joanna Briggs Institute critical appraisal tool for prevalence studies was used to assess the quality of studies addressing prevalence of YOA.<sup>18</sup> The Newcastle-Ottawa-Quality Assessment Scale was used to assess the quality of all other studies.<sup>19</sup> In this scale, observational studies were scored across 3 categories: selection (4 questions) and comparability (2 questions) of study groups and ascertainment of the outcome of interest (3 questions); all questions had a score of 1 except for comparability of study groups, in which separate points were awarded for controlling age and/or sex (maximum of 2 points). Studies with a cumulative score  $\geq 7$  were considered high quality.

**Data synthesis and statistical analyses.** Two key questions had sufficient data available to perform meta-analyses: Key Question 1 on the prevalence of YOA and Key Question 3 on the rate of metachronous neoplasia on follow-up. For these 2 questions, we pooled corresponding data by using the random-effects model described by DerSimonian and Laird.<sup>18</sup>

For adenoma prevalence, the outcome was expressed as a pooled proportion, with 95% CIs. We also conducted pre-planned subgroup analyses based on colonoscopy vs autopsy studies, indication for colonoscopy (symptomatic vs asymptomatic), and location (Western vs Afro-Asian). We also conducted time trend analysis by abstracting data on the proportion of patients found with adenomas on autopsy or colonoscopy before 1995 vs after 1995. The year 1995 was used as the cutoff for this subgroup analysis because it is the year after which the rise in early-onset CRC has been observed.<sup>3</sup> For rate of metachronous neoplasia on follow-up, the outcome was expressed as a proportion, with 95% CIs. We did not perform any subgroup analyses based on the year of publication because these did not reflect the time of patient recruitment. We assessed statistical heterogeneity by using  $I^2$  statistic, which estimates the proportion of total variances across studies that was due to heterogeneity rather than chance.<sup>21</sup> Values greater than 50% indicate substantial heterogeneity. Publication bias was assessed qualitatively by visual inspection of funnel plots. For all tests except for publication bias, a probability level  $< .05$  was considered statistically significant. All analyses were performed by using Comprehensive Meta-Analysis version 2 (Biostat, Englewood, NJ). Small study effects were assessed by examining funnel plot asymmetry.

|      |                                                                    |                                                             |      |
|------|--------------------------------------------------------------------|-------------------------------------------------------------|------|
| 1277 | <b>Literature search terms.</b> <i>PubMed search terms.</i> Search | OR recurrente12[tiab] OR recurrented[tiab] OR recur-        | 1335 |
| 1278 | ((("Young Adult"[Mesh] OR "Adult"[Mesh:noexp] OR                   | rentes[tiab] OR recurrentgastroic[tiab] OR recurrentgen-    | 1336 |
| 1279 | (young adult[tiab] OR young adult,[tiab] OR young                  | eralized[tiab] OR recurrential[tiab] OR recurrentis[tiab]   | 1337 |
| 1280 | adulthood[tiab] OR young adults[tiab])) OR younger                 | OR recurrently[tiab] OR recurrentnasal[tiab] OR recur-      | 1338 |
| 1281 | adults[tiab] OR "Age of Onset"[Mesh] OR young[tiab] OR             | rentpleural[tiab] OR recurrentpolyhedritis[tiab] OR         | 1339 |
| 1282 | younger[tiab]) AND ("Colonoscopy"[Mesh] OR "Follow-                | recurrentpregnancy[tiab] OR recurrentpulmonary[tiab]        | 1340 |
| 1283 | Up Studies"[Mesh] OR "Early Detection of Cancer"[Mesh]             | OR recurrentspontaneousabortion                             | 1341 |
| 1284 | OR screening[tiab] OR early detection[tiab] OR surveil-            | [tiab] OR recurrenttumors[tiab] OR recurrentvte[tiab]       | 1342 |
| 1285 | lance[tiab] OR "Incidence"[Mesh] OR "Prevalence"[Mesh]             | OR recurrenty[tiab])) AND ((("colon"[MeSH Terms] OR         | 1343 |
| 1286 | OR incidence[tiab] OR prevalence[tiab] OR "Risk Fac-               | "colon"[tiab]) AND ((("Adenomatous Polyps"[Mesh] OR         | 1344 |
| 1287 | tors"[Mesh] OR (risk factor[tiab] OR risk factor's[tiab]           | "Adenoma, Villous"[Mesh] OR "adenoma*[tiab]) OR             | 1345 |
| 1288 | OR risk factore[tiab] OR risk factored[tiab] OR risk fac-          | ("Colonic Polyps"[Mesh] OR (((("colon"[MeSH Terms] OR       | 1346 |
| 1289 | tors[tiab] OR risk factors,[tiab] OR risk factory[tiab]) OR        | "colon"[All Fields]) OR ("colon"[MeSH Terms] OR "colo-      | 1347 |
| 1290 | "Neoplasms, Second Primary"[Mesh] OR second primary                | n"[All Fields] OR "colonic"[All Fields])) AND polyp[tiab]   | 1348 |
| 1291 | colorectal cancer[tiab] OR "Neoplasm Recurrence,                   | OR polyps[tiab]))                                           | 1349 |
| 1292 | Local"[Mesh] OR (recurren[tiab] OR recurrenc[tiab] OR              | <i>Embase search terms.</i> (('colonoscopy'/syn AND 'adeno- | 1350 |
| 1293 | recurrence[tiab] OR recurrence'[tiab] OR recurrence's              | matous polyp'/syn OR (adenomatous AND polyp) OR             | 1351 |
| 1294 | [tiab] OR recurrence20[tiab] OR recurrenceassociated               | 'adenomatous polyp' OR adenoma OR metachronous OR           | 1352 |
| 1295 | [tiab] OR recurrencebut[tiab] OR recurrencec[tiab] OR              | (colorectal AND adenomas) OR 'colorectal adenoma')          | 1353 |
| 1296 | recurrenced[tiab] OR recurrencee[tiab] OR recurrence-              | AND 'polypectomy surveillance' OR (polypectomy AND          | 1354 |
| 1297 | free[tiab] OR recurrencegrey[tiab] OR recurrencegtv                | surveillance) OR (adenoma AND surveillance) OR 'ade-        | 1355 |
| 1298 | [tiab] OR recurrencein[tiab] OR recurrenceel[tiab] OR              | nomia surveillance' OR ('post polypectomy' AND sur-         | 1356 |
| 1299 | recurrenceless[tiab] OR recurrenceeliterature[tiab] OR             | veillance) OR 'post-polypectomy surveillance') AND          | 1357 |
| 1300 | recurrenceemva[tiab] OR recurrenceen[tiab] OR recurren-            | ('risk factor' AND 'adenomatous polyp'/syn OR (adeno-       | 1358 |
| 1301 | cent[tiab] OR recurrenceof[tiab] OR recurrenceonline               | matous AND poly) OR 'adenomatous polyp' OR adenoma          | 1359 |
| 1302 | [tiab] OR recurrencecerate[tiab] OR recurrencecerates[tiab]        | OR metachronous OR (colorectal AND adenomas) OR             | 1360 |
| 1303 | OR recurrenceeree[tiab] OR recurrenceerelative[tiab] OR            | 'colorectal adenoma') AND 'Young Adult'/syn OR 'young'      | 1361 |
| 1304 | recurrences[tiab] OR recurrences'[tiab] OR recurrence-             | OR 'younger' or 'young adults'                              | 1362 |
| 1305 | score[tiab] OR recurrenceesed[tiab] OR recurrencees                | +                                                           | 1363 |
| 1306 | [tiab] OR recurrenceesor[tiab] OR recurrenceess[tiab] OR           | **riskfactors for YOA                                       | 1364 |
| 1307 | recurrencew[tiab] OR recurrencewithout[tiab] OR                    | risk AND factors AND adenomatous AND polyp AND              | 1365 |
| 1308 | recurrencia[tiab] OR recurrencial[tiab] OR recurrencias            | young                                                       | 1366 |
| 1309 | [tiab] OR recurrencies[tiab] OR recurrencs[tiab] OR                | ('colonoscopy'/syn AND 'adenomatous polyp'/syn OR           | 1367 |
| 1310 | recurrenct[tiab] OR recurrency[tiab] OR recurrencys                | (adenomatous AND polyp) OR 'adenomatous polyp' OR           | 1368 |
| 1311 | [tiab] OR recurrend[tiab] OR recurrene[tiab] OR recurren-          | adenoma OR metachronous OR (colorectal AND ade-             | 1369 |
| 1312 | ened[tiab] OR recurreness[tiab] OR recurrens[tiab] OR              | nomas) OR 'colorectal adenoma') AND 'polypectomy            | 1370 |
| 1313 | recurrens'[tiab] OR recurrenstam3[tiab] OR recurrent               | surveillance' OR (polypectomy AND surveillance) OR          | 1371 |
| 1314 | [tiab] OR recurrent'[tiab] OR recurrentabortion[tiab] OR           | (adenoma AND surveillance) OR 'adenoma surveillance'        | 1372 |
| 1315 | recurrentacutepancreatitis[tiab] OR recurrentbladder               | OR ('post polypectomy' AND surveillance) OR 'post-pol-      | 1373 |
| 1316 | [tiab] OR recurrentbrca1alleles[tiab] OR recurrente[tiab]          | ypectomy surveillance'.                                     | 1374 |
| 1317 |                                                                    |                                                             | 1375 |
| 1318 |                                                                    |                                                             | 1376 |
| 1319 |                                                                    |                                                             | 1377 |
| 1320 |                                                                    |                                                             | 1378 |
| 1321 |                                                                    |                                                             | 1379 |
| 1322 |                                                                    |                                                             | 1380 |
| 1323 |                                                                    |                                                             | 1381 |
| 1324 |                                                                    |                                                             | 1382 |
| 1325 |                                                                    |                                                             | 1383 |
| 1326 |                                                                    |                                                             | 1384 |
| 1327 |                                                                    |                                                             | 1385 |
| 1328 |                                                                    |                                                             | 1386 |
| 1329 |                                                                    |                                                             | 1387 |
| 1330 |                                                                    |                                                             | 1388 |
| 1331 |                                                                    |                                                             | 1389 |
| 1332 |                                                                    |                                                             | 1390 |
| 1333 |                                                                    |                                                             | 1391 |
| 1334 |                                                                    |                                                             | 1392 |

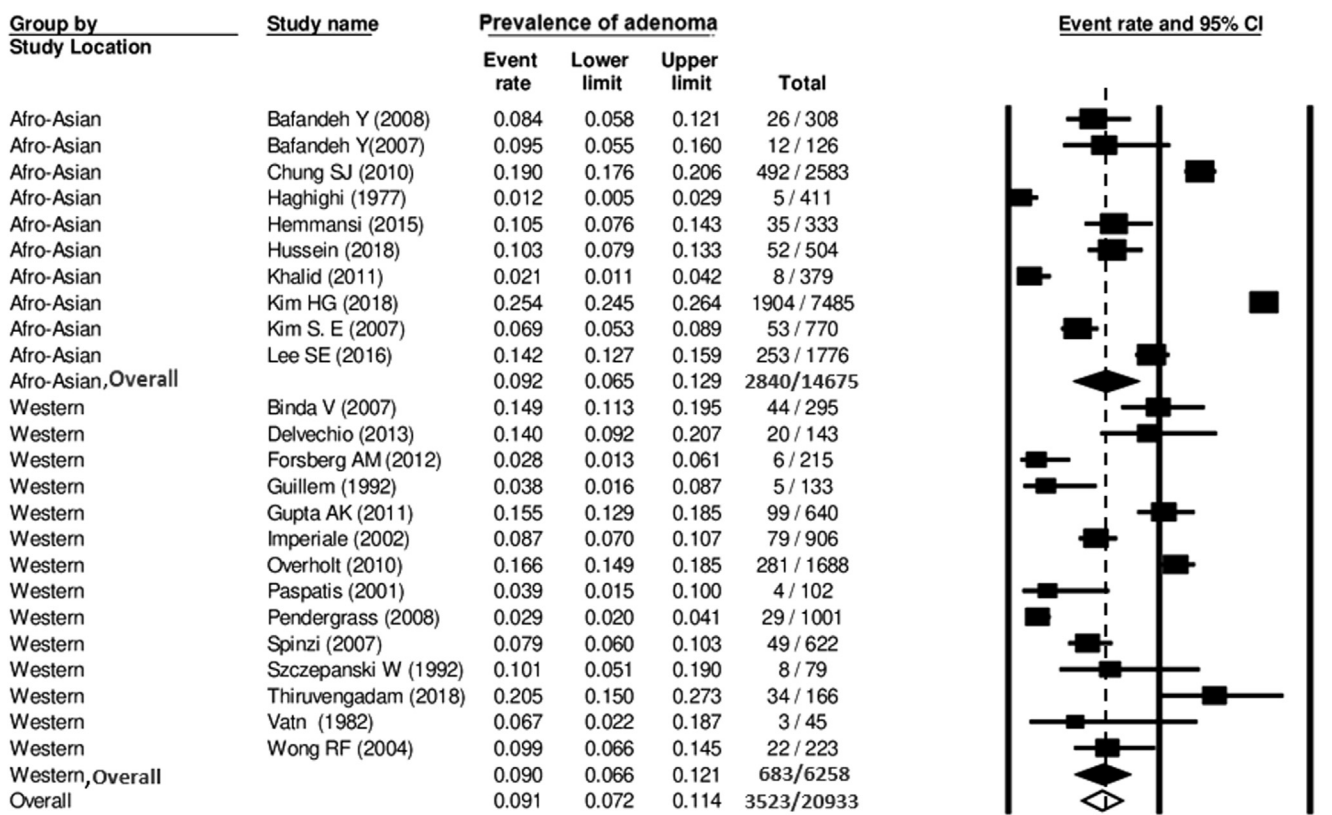

**Supplementary Figure 1.** Pooled prevalence of young-onset adenoma (Western vs Afro-Asian regions). Rectangles denote pooled estimate for each study; filled diamonds denote pooled estimates for the 2 subgroups; unfilled diamond denotes overall pooled estimate for all studies. CI, confidence interval.

UNCORRECTED

**Supplementary Table 1.** Characteristics of Included Studies (n = 28 Studies Including 103,668 Individuals)

| Study name          | Study period | Quality  | Ages included in each study (y) | Location                      | Indication for colonoscopy                                                                                                  | Key Question (KQ) addressed                                                                                          |
|---------------------|--------------|----------|---------------------------------|-------------------------------|-----------------------------------------------------------------------------------------------------------------------------|----------------------------------------------------------------------------------------------------------------------|
| Bafandeh Y (2008)   | 2005–2007    | Moderate | 18–49                           | Tabriz, Iran                  | Colonoscopy for unexplained lower GI symptoms in patients <50 y                                                             | KQ1: Prevalence of YOA                                                                                               |
| Bafandeh Y (2007)   | 2005–2007    | Moderate | 30–49                           | Tabriz, Iran                  | Colonoscopy for unexplained lower GI symptoms in patients <50 y                                                             | KQ1: Prevalence of YOA                                                                                               |
| Binda V (2007)      | 1999–2000    | Moderate | 40–49                           | Brazil                        | Colonoscopy for unexplained lower GI symptoms in patients <50 y                                                             | KQ1: Prevalence of YOA                                                                                               |
| Chen HM (2011)      | 1990–2009    | Low      | 18–49                           | China                         | Consecutive subjects <49 y who received colonoscopy for bloody stool                                                        | KQ2: Risk factors for YOA                                                                                            |
| Chung SJ (2010)     | 2004–2007    | Moderate | 30–49                           | Seoul, South Korea            | Asymptomatic screening colonoscopy as part of annual health checkup in patients <50 y                                       | KQ1: Prevalence of YOA<br>KQ2: Risk factors for YOA                                                                  |
| Delvechio G (2013)  | 2006–2008    | Moderate | 40–49                           | Rome, Italy                   | Patients aged 40–49 y with at least 1 FDR (40 to ≥70 y of age) with CRC                                                     | KQ1: Prevalence of YOA                                                                                               |
| Forsberg AM (2012)  | 2002–2006    | High     | 18–45                           | Stockholm, Sweden             | Colonoscopy performed (regardless of indication) on a sample of patients ≤45 y drawn from the Swedish population register   | KQ1: Prevalence of YOA                                                                                               |
| Guillem JG (1992)   | 1980–1990    | Moderate | 20–49                           | New York                      | Patients aged 20–49 with FDR with CRC                                                                                       | KQ1: Prevalence of YOA                                                                                               |
| Gupta AK (2011)     | 1999–2009    | Moderate | 40–49                           | Michigan                      | Patients aged 40–49 y with FDR with CRC                                                                                     | KQ1: Prevalence of YOA<br>KQ2: Risk factors for YOA                                                                  |
| Haghighi P (1977)   | 1962–1973    | High     | 20–49                           | Southern Iran                 | Prospective review by experienced colon pathologist of all colon specimens removed from consecutive autopsies in ages 20–49 | KQ1: Prevalence of YOA                                                                                               |
| Hemmansi G (2015)   | 2009–2012    | Low      | 40–49                           | Firoozgan, Iran               | Asymptomatic patients aged 40–49 undergoing colonoscopy for screening                                                       | KQ1: Prevalence of YOA                                                                                               |
| Hussein K (2018)    | 2016–2018    | Moderate | 18–49                           | Lebanon                       | Colonoscopy for unexplained lower GI symptoms, and family history of IBD or CRC in patients <50 y                           | KQ1: Prevalence of YOA                                                                                               |
| Imperiale TF (2002) | 1995–2000    | Moderate | 40–49                           | Indianapolis, IN              | Asymptomatic patients aged 40–49 years undergoing colonoscopy for screening                                                 | KQ1: Prevalence of YOA                                                                                               |
| Khalid AB (2011)    | 2007–2009    | Moderate | 18–49                           | Karachi, Pakistan             | Patients aged 18–49 with symptoms of fresh blood per rectum in the previous 6 mo                                            | KQ1: Prevalence of YOA                                                                                               |
| Kim HG (2018)       | 2006–2010    | Moderate | 20–49                           | Guangdong, Seoul, South Korea | Asymptomatic patients aged 20–49 undergoing screening colonoscopy and subsequent surveillance colonoscopy                   | KQ1: Prevalence of YOA<br>KQ3: Risk of metachronous advanced neoplasia on follow-up<br>KQ4: Risk of CRC on follow-up |
| Kim NH (2018)       | 2010–2017    | Moderate | 30–49                           | Seoul and Suwon, South Korea  | Asymptomatic patients aged 30–49 undergoing screening colonoscopy, and subsequent surveillance colonoscopy                  | KQ3: Risk of metachronous advanced neoplasia on follow-up<br>KQ4: Risk of CRC on follow-up                           |
| Kim SE (2007)       | 2005         | Moderate | 30–49                           | Seoul, South Korea            | Asymptomatic patients aged 30–49 undergoing screening colonoscopy                                                           | KQ1: Prevalence of YOA                                                                                               |
| Lee SE (2016)       | 2012–2014    | Moderate | 18–49                           | Goyan, South Korea            | Symptomatic and asymptomatic patients age <50 undergoing colonoscopy as part of routine health checkups                     | KQ1: Prevalence of YOA<br>KQ 2: Risk factors for YOA                                                                 |
| Nagpal SJ (2018)    | 1984–2012    | Moderate | 18–49                           | Cleveland, OH                 | Patients age <40 who underwent polypectomy and subsequent colonoscopy for surveillance                                      | KQ3: Risk of metachronous advanced neoplasia on follow-up<br>KQ4: Risk of CRC on follow-up                           |
| Overholt BF (2010)  | 2007         | Moderate | 40–49                           | USA, Canada                   | Patients aged 40–49 undergoing colonoscopy as part of routine health checkups, regardless of symptoms                       | KQ1: Prevalence of YOA                                                                                               |
| Park SK (2015)      | 2009–2012    | Moderate | 18–49                           | Seoul, South Korea            | Patients who underwent initial colonoscopy with polypectomy and subsequent surveillance colonoscopy                         | KQ3: Risk of metachronous advanced neoplasia on follow-up<br>KQ4: Risk of CRC on follow-up                           |

1509 1567  
 1510 1568  
 1511 1569  
 1512 1570  
 1513 1571  
 1514 1572  
 1515 1573  
 1516 1574  
 1517 1575  
 1518 1576  
 1519 1577  
 1520 1578  
 1521 1579  
 1522 1580  
 1523 1581  
 1524 1582  
 1525 1583  
 1526 1584  
 1527 1585  
 1528 1586  
 1529 1587  
 1530 1588  
 1531 1589  
 1532 1590  
 1533 1591  
 1534 1592  
 1535 1593  
 1536 1594  
 1537 1595  
 1538 1596  
 1539 1597  
 1540 1598  
 1541 1599  
 1542 1600  
 1543 1601  
 1544 1602  
 1545 1603  
 1546 1604  
 1547 1605  
 1548 1606  
 1549 1607  
 1550 1608  
 1551 1609  
 1552 1610  
 1553 1611  
 1554 1612  
 1555 1613  
 1556 1614  
 1557 1615  
 1558 1616  
 1559 1617  
 1560 1618  
 1561 1619  
 1562 1620  
 1563 1621  
 1564 1622  
 1565 1623  
 1566 1624



|      |                 |           |          |       |                |                                                                                                                                        |                        |  |  |  |
|------|-----------------|-----------|----------|-------|----------------|----------------------------------------------------------------------------------------------------------------------------------------|------------------------|--|--|--|
| 1625 |                 |           |          |       |                |                                                                                                                                        |                        |  |  |  |
| 1626 |                 |           |          |       |                |                                                                                                                                        |                        |  |  |  |
| 1627 |                 |           |          |       |                |                                                                                                                                        |                        |  |  |  |
| 1628 |                 |           |          |       |                |                                                                                                                                        |                        |  |  |  |
| 1629 |                 |           |          |       |                |                                                                                                                                        |                        |  |  |  |
| 1630 |                 |           |          |       |                |                                                                                                                                        |                        |  |  |  |
| 1631 |                 |           |          |       |                |                                                                                                                                        |                        |  |  |  |
| 1632 |                 |           |          |       |                |                                                                                                                                        |                        |  |  |  |
| 1633 |                 |           |          |       |                |                                                                                                                                        |                        |  |  |  |
| 1634 |                 |           |          |       |                |                                                                                                                                        |                        |  |  |  |
| 1635 |                 |           |          |       |                |                                                                                                                                        |                        |  |  |  |
| 1636 |                 |           |          |       |                |                                                                                                                                        |                        |  |  |  |
| 1637 |                 |           |          |       |                |                                                                                                                                        |                        |  |  |  |
| 1638 |                 |           |          |       |                |                                                                                                                                        |                        |  |  |  |
| 1639 |                 |           |          |       |                |                                                                                                                                        |                        |  |  |  |
| 1640 |                 |           |          |       |                |                                                                                                                                        |                        |  |  |  |
| 1641 |                 |           |          |       |                |                                                                                                                                        |                        |  |  |  |
| 1642 |                 |           |          |       |                |                                                                                                                                        |                        |  |  |  |
| 1643 |                 |           |          |       |                |                                                                                                                                        |                        |  |  |  |
| 1644 |                 |           |          |       |                |                                                                                                                                        |                        |  |  |  |
| 1645 |                 |           |          |       |                |                                                                                                                                        |                        |  |  |  |
| 1646 |                 |           |          |       |                |                                                                                                                                        |                        |  |  |  |
| 1647 |                 |           |          |       |                |                                                                                                                                        |                        |  |  |  |
| 1648 |                 |           |          |       |                |                                                                                                                                        |                        |  |  |  |
| 1649 |                 |           |          |       |                |                                                                                                                                        |                        |  |  |  |
| 1650 |                 |           |          |       |                |                                                                                                                                        |                        |  |  |  |
| 1651 |                 |           |          |       |                |                                                                                                                                        |                        |  |  |  |
| 1652 |                 |           |          |       |                |                                                                                                                                        |                        |  |  |  |
| 1653 |                 |           |          |       |                |                                                                                                                                        |                        |  |  |  |
| 1654 |                 |           |          |       |                |                                                                                                                                        |                        |  |  |  |
| 1655 |                 |           |          |       |                |                                                                                                                                        |                        |  |  |  |
| 1656 |                 |           |          |       |                |                                                                                                                                        |                        |  |  |  |
| 1657 |                 |           |          |       |                |                                                                                                                                        |                        |  |  |  |
| 1658 |                 |           |          |       |                |                                                                                                                                        |                        |  |  |  |
| 1659 |                 |           |          |       |                |                                                                                                                                        |                        |  |  |  |
| 1660 |                 |           |          |       |                |                                                                                                                                        |                        |  |  |  |
| 1661 |                 |           |          |       |                |                                                                                                                                        |                        |  |  |  |
| 1662 |                 |           |          |       |                |                                                                                                                                        |                        |  |  |  |
| 1663 |                 |           |          |       |                |                                                                                                                                        |                        |  |  |  |
| 1664 |                 |           |          |       |                |                                                                                                                                        |                        |  |  |  |
| 1665 |                 |           |          |       |                |                                                                                                                                        |                        |  |  |  |
| 1666 |                 |           |          |       |                |                                                                                                                                        |                        |  |  |  |
| 1667 |                 |           |          |       |                |                                                                                                                                        |                        |  |  |  |
| 1668 |                 |           |          |       |                |                                                                                                                                        |                        |  |  |  |
| 1669 |                 |           |          |       |                |                                                                                                                                        |                        |  |  |  |
| 1670 |                 |           |          |       |                |                                                                                                                                        |                        |  |  |  |
| 1671 |                 |           |          |       |                |                                                                                                                                        |                        |  |  |  |
| 1672 |                 |           |          |       |                |                                                                                                                                        |                        |  |  |  |
| 1673 |                 |           |          |       |                |                                                                                                                                        |                        |  |  |  |
| 1674 |                 |           |          |       |                |                                                                                                                                        |                        |  |  |  |
| 1675 |                 |           |          |       |                |                                                                                                                                        |                        |  |  |  |
| 1676 |                 |           |          |       |                |                                                                                                                                        |                        |  |  |  |
| 1677 |                 |           |          |       |                |                                                                                                                                        |                        |  |  |  |
| 1678 |                 |           |          |       |                |                                                                                                                                        |                        |  |  |  |
| 1679 |                 |           |          |       |                |                                                                                                                                        |                        |  |  |  |
| 1680 |                 |           |          |       |                |                                                                                                                                        |                        |  |  |  |
| 1681 |                 |           |          |       |                |                                                                                                                                        |                        |  |  |  |
| 1682 |                 |           |          |       |                |                                                                                                                                        |                        |  |  |  |
|      | Paspatis GA     | 1997–1999 | High     | 18–49 | Crete, Greece  | Forensic postmortem autopsies with examination of the colon (performed for cases age <50 with sudden or violent or undiagnosed deaths) | KQ1: Prevalence of YOA |  |  |  |
|      | Pendergrass CJ  | 1985–2004 | High     | 20–49 | Baltimore, MD  | Postmortem autopsy of cases aged 20–49, without any documented GI symptoms, GI diagnosis, or family history of CRC                     | KQ1: Prevalence of YOA |  |  |  |
|      | Spinzi G (2007) | 2002      | Moderate | 30–49 | Italy          | Patients aged 30–49 undergoing colonoscopy for hematochezia                                                                            | KQ1: Prevalence of YOA |  |  |  |
|      | Szczepanski W   | 1974–1978 | High     | 18–49 | Krakow, Poland | Prospective study of consecutive autopsies with examination of the colon under a magnifying lens in cases aged <50                     | KQ1: Prevalence of YOA |  |  |  |
|      | Thiruvengadam R | 2013–2018 | Low      | 18–40 | California     | Retrospective review of colonoscopy performed by a single provider with ADR of 70%, in asymptomatic patients <40 y old                 | KQ1: Prevalence of YOA |  |  |  |
|      | Vatn M (1982)   | 1972–1973 | High     | 18–40 | Oslo, Norway   | Prospective study of consecutive autopsies with examination of the colon under a magnifying lens in cases <40 y old                    | KQ1: Prevalence of YOA |  |  |  |
|      | Wong RF (2004)  | 1997–1999 | Moderate | 18–49 | Utah           | Consecutive veterans age <50 who underwent colonoscopy for rectal bleeding                                                             | KQ1: Prevalence of YOA |  |  |  |

ADR, adenoma detection rate; CRC, colorectal cancer; FDR, first-degree relative; GI, gastrointestinal; IBD, inflammatory bowel disease; KQ, Key Question; YOA, young-onset adenoma.

1683  
1684  
1685  
1686  
1687  
1688  
1689  
1690  
1691  
1692  
1693  
1694  
1695  
1696  
1697  
1698  
1699  
1700  
1701  
1702  
1703  
1704  
1705  
1706  
1707  
1708  
1709  
1710  
1711  
1712  
1713  
1714  
1715  
1716  
1717  
1718  
1719  
1720  
1721  
1722  
1723  
1724  
1725  
1726  
1727  
1728  
1729  
1730  
1731  
1732  
1733  
1734  
1735  
1736  
1737  
1738  
1739  
1740

**Supplementary Table 2.** Findings From Studies Addressing KQ1: What Is the Prevalence of Young-Onset Adenoma? (n = 24 Studies Including 20,933 Individuals)

| Study name          | Study period | Quality  | Location           | Indication of colonoscopy                                                                                                    | Adenoma prevalence                                                                                                                                                                         |
|---------------------|--------------|----------|--------------------|------------------------------------------------------------------------------------------------------------------------------|--------------------------------------------------------------------------------------------------------------------------------------------------------------------------------------------|
| Colonoscopy studies |              |          |                    |                                                                                                                              |                                                                                                                                                                                            |
| Bafandeh Y (2008)   | 2005–2007    | Moderate | Tabriz, Iran       | Colonoscopy for unexplained lower GI symptoms in patients younger than 50                                                    | Age <30: 4.6% (n = 5/108),<br>Age 30–39: 9.1% (n = 10/110)<br>Age 40–49: 12.2% (n = 11/90)<br>Overall: 8% (n = 26/308)                                                                     |
| Bafandeh Y (2007)   | 2005–2007    | Moderate | Tabriz, Iran       | Colonoscopy for unexplained lower GI symptoms in patients younger than 50                                                    | Age 30–39: 7.9% (n = 6/76)<br>Age 40–49: 12% (n = 6/50)<br>Overall: 11% (n = 12/126)                                                                                                       |
| Binda V (2007)      | 1999–2000    | Moderate | Brazil             | Colonoscopy for unexplained lower GI symptoms, anemia, and weight loss in patients younger than 50                           | 14.9% (n = 44/295)                                                                                                                                                                         |
| Chung SJ (2010)     | 2004–2007    | Moderate | Seoul, South Korea | Asymptomatic screening colonoscopy as part of annual health checkup in patients <50 y                                        | Age 30–39: 10.4% (n = 63/608)<br>Age 40–49: 22.0% (n = 429/1930)<br>Overall: 19% (n = 492/2583)                                                                                            |
| Delvechio G (2013)  | 2006–2008    | Moderate | Rome, Italy        | Patients aged 40–49 with at least 1 FDR (40 to ≥70 y of age) with CRC                                                        | 14% (n = 20/143)                                                                                                                                                                           |
| Forsberg AM (2012)  | 2002–2006    | High     | Stockholm, Sweden  | Colonoscopy performed (regardless of indication) on a sample of patients aged ≤45 drawn from the Swedish population register | 2.8% (n = 6/215)                                                                                                                                                                           |
| Guillem JG (1992)   | 1980–1990    | Moderate | New York           | Patients aged 20–49 with FDR with CRC                                                                                        | FDR:<br>Age 2–29: 0% (n = 0/5)<br>Age 30–39: 2% (n = 1/49)<br>Age 40–49: 8.3% (n = 4/48)<br><br>Control:<br>Age 20–29: 0% (n = 0/0)<br>Age 30–39: 0% (n = 0/7)<br>Age 40–49: 0% (n = 0/24) |
| Gupta AK (2011)     | 1999–2009    | Moderate | Michigan           | Patients aged 40–49 with FDR with CRC                                                                                        | Overall: 3% (n = 5/133)<br>Age 40–44: 9.2% (n = 9/314)<br>Age 45–49: 21.5% (n = 70/326)                                                                                                    |
| Hemmansi G (2015)   | 2009–2012    | Low      | Firoozgan, Iran    | Asymptomatic patients aged 40–49 undergoing colonoscopy for screening                                                        | Overall: 12% (n = 99/640)<br>Male: 12.2% (n = 19/156)<br>Female: 9.0% (n = 16/177)<br>Overall: 10.5% (n = 35/333)                                                                          |
| Hussein K (2018)    | 2016–2018    | Moderate | Lebanon            | Colonoscopy for unexplained lower GI symptoms, abnormal imaging, and family history of IBD or CRC in patients <50 y          | Age 18–40: 3.6% (n = 12/330)<br>Age 40–49: 23.0% (n = 40/174)<br>Overall: 10% (n = 52/504)                                                                                                 |
| Imperiale TF (2002) | 1995–2000    | Moderate | Indianapolis, IN   | Asymptomatic patients aged 40–49 undergoing colonoscopy for screening                                                        | Overall: 8.7% (n = 79/906)                                                                                                                                                                 |

Supplementary Table 2. Continued

| Study name                           | Study period | Quality  | Location                      | Indication of colonoscopy                                                                                                                          | Adenoma prevalence                                                                                                                                                                                                                                                             |
|--------------------------------------|--------------|----------|-------------------------------|----------------------------------------------------------------------------------------------------------------------------------------------------|--------------------------------------------------------------------------------------------------------------------------------------------------------------------------------------------------------------------------------------------------------------------------------|
| Khalid AB (2011)                     | 2007–2009    | Moderate | Karachi, Pakistan             | Patients aged 18–49 with symptoms of fresh blood per rectum in the previous 6 mo                                                                   | Overall: 2.1% (n = 8/379)                                                                                                                                                                                                                                                      |
| Kim HG (2018)                        | 2006–2010    | Moderate | Guangdong, Seoul, South Korea | Asymptomatic patients aged 20–49 undergoing screening colonoscopy and subsequent surveillance colonoscopy                                          | Age 20–39: 19% (n = 243/1278)<br>Age 40–49: 26.7% (n = 1661/6207)<br>Overall: 25.4% (n = 1904/7485)                                                                                                                                                                            |
| Kim SE (2007)                        | 2005         | Moderate | Seoul, South Korea            | Asymptomatic patients aged 30–49 undergoing screening colonoscopy                                                                                  | Male:<br>Age 30–39: 2.7% (n = 4/149)<br>Age 40–49: 12.3% (n = 34/275)<br>Female:<br>Age 30–39: 1.6% (n = 2/127)<br>Age 40–49: 5.9% (n = 13/219)<br>Overall: 7% (n = 53/770)<br>Age 18–40: 8.8% (n = 61/694)<br>Age 40–44: 14.7% (n = 87/591)<br>Age 45–49: 21.3% (n = 105/491) |
| Lee SE (2016)                        | 2012–2014    | Moderate | Goyan, South Korea            | Symptomatic and asymptomatic patients younger than age 50 undergoing colonoscopy as part of routine health checkups                                | Overall: 8% (n = 253/1776)                                                                                                                                                                                                                                                     |
| Overholt BF (2010)                   | 2007         | Moderate | USA, Canada                   | Patients aged 40–49 undergoing colonoscopy as part of routine health checkups, regardless of symptoms                                              | Overall: 16.7% (n = 281/1688)                                                                                                                                                                                                                                                  |
| Spinzi G (2007)                      | 2002         | Moderate | Italy                         | Patients aged 30–49 undergoing colonoscopy for hematochezia                                                                                        | Age 30–40: 4.5% (n = 14/312)<br>Age 41–50: 11.3% (n = 35/310)<br>Overall: 8% (n = 49/622)                                                                                                                                                                                      |
| Thiruvengadam R (2018)               | 2013–2018    | Low      | California                    | Retrospective review of colonoscopy performed by a single provider with ADR of 70%, in asymptomatic patients younger than age 40                   | Age 18–30: 6.8% (n = 4/59)<br>Age 31–40: 28% (n = 30/107)<br>Overall: 39% (n = 34/166)                                                                                                                                                                                         |
| Wong RF (2004)                       | 1997–1999    | Moderate | Utah                          | Consecutive veterans younger than age 50 who underwent colonoscopy for rectal bleeding                                                             | Overall: 9.9% (n = 22/223)                                                                                                                                                                                                                                                     |
| Autopsy studies<br>Haghighi P (1977) | 1962–1973    | High     | Southern Iran                 | Prospective review with a magnifying lens by experienced colon pathologist of all colon specimens removed from consecutive autopsies in ages 20–49 | Age 20–30: 0.7% (n = 1/140)<br>Age 30–40: 1.3% (n = 2/150)<br>Age 40–50: 1.7% (n = 2/121)<br>Overall: 1% (n = 5/411)                                                                                                                                                           |

Supplementary Table 2. Continued

| Study name            | Study period | Quality | Location       | Indication of colonoscopy                                                                                                              | Adenoma prevalence                                                                                                        |
|-----------------------|--------------|---------|----------------|----------------------------------------------------------------------------------------------------------------------------------------|---------------------------------------------------------------------------------------------------------------------------|
| Paspatis GA (2001)    | 1997–1999    | High    | Crete, Greece  | Forensic postmortem autopsies with examination of the colon (performed for cases <age 50 with sudden or violent or undiagnosed deaths) | Male: 5.5% (n = 4/72)<br>Female: 0% (n = 0/30)<br>Overall: 4% (n = 4/102)                                                 |
| Pendergrass CJ (2008) | 1985–2004    | High    | Baltimore, MD  | Postmortem autopsy of cases aged 20–49, without any documented GI symptoms, GI diagnosis, or family history of CRC                     | Age 20–29: 1.4% (n = 2/144)<br>Age 30–39: 2.4% (n = 8/334)<br>Age 40–49: 3.6% (n = 19/523)<br>Overall: 2.9% (n = 29/1001) |
| Szczepanski W (1992)  | 1974–1978    | High    | Krakow, Poland | Prospective study of consecutive autopsies with examination of the colon under a magnifying lens in cases younger than age 40          | Male: 15.9% (n = 7/44)<br>Female: 2.9% (n = 1/35)<br>Overall: 10% (n = 8/79)                                              |
| Vatn M (1982)         | 1972–1973    | High    | Oslo, Norway   | Prospective study of consecutive autopsies with examination of the colon under a magnifying lens in cases younger than age 40          | Overall: 6.7% (n = 3/45)                                                                                                  |

ADR, adenoma detection rate; CRC, colorectal cancer; FDR, first-degree relative; GI, gastrointestinal; IBD, inflammatory bowel disease; KQ, key question; YOA, young-onset adenoma.



**Supplementary Table 3.** Key Question 1 Studies Grouped by Region and Symptom Status

| Study name             | Study period | Quality  | Location                      | Region     | Indication of colonoscopy |
|------------------------|--------------|----------|-------------------------------|------------|---------------------------|
| Bafandeh Y (2008)      | 2005–2007    | Moderate | Tabriz, Iran                  | Afro-Asian | Symptomatic               |
| Bafandeh Y (2007)      | 2005–2007    | Moderate | Tabriz, Iran                  | Afro-Asian | Symptomatic               |
| Binda V (2007)         | 1999–2000    | Moderate | Brazil                        | Western    | Symptomatic               |
| Chung SJ (2010)        | 2004–2007    | Moderate | Seoul, South Korea            | Afro-Asian | Asymptomatic              |
| Delvechio G (2013)     | 2006–2008    | Moderate | Rome, Italy                   | Western    | Not specified             |
| Forsberg AM (2012)     | 2002–2006    | High     | Stockholm, Sweden             | Western    | Not specified             |
| Guillem JG (1992)      | 1980–1990    | Moderate | New York                      | Western    | Not specified             |
| Gupta AK (2011)        | 1999–2009    | Moderate | Michigan                      | Western    | Not specified             |
| Haghighi P (1977)      | 1962–1973    | High     | Southern Iran                 | Afro-Asian | Not applicable            |
| Hemmansi G (2015)      | 2009–2012    | Low      | Firoozgan, Iran               | Afro-Asian | Asymptomatic              |
| Hussein K (2018)       | 2016–2018    | Moderate | Lebanon                       | Afro-Asian | Symptomatic               |
| Imperiale TF (2002)    | 1995–2000    | Moderate | Indianapolis, IN              | Western    | Asymptomatic              |
| Khalid AB (2011)       | 2007–2009    | Moderate | Karachi, Pakistan             | Afro-Asian | Asymptomatic              |
| Kim HG (2018)          | 2006–2010    | Moderate | Guangdong, Seoul, South Korea | Afro-Asian | Asymptomatic              |
| Kim SE (2007)          | 2005         | Moderate | Seoul, South Korea            | Afro-Asian | Asymptomatic              |
| Lee SE (2016)          | 2012–2014    | Moderate | Goyan, South Korea            | Afro-Asian | Not specified             |
| Overholt BF (2010)     | 2007         | Moderate | USA, Canada                   | Western    | Not specified             |
| Paspatis GA (2001)     | 1997–1999    | High     | Crete, Greece                 | Western    | Not applicable            |
| Pendergrass CJ (2008)  | 1985–2004    | High     | Baltimore, MD                 | Western    | Not applicable            |
| Spinzi G (2007)        | 2002         | Moderate | Italy                         | Western    | Symptomatic               |
| Szczepanski W (1992)   | 1974–1978    | High     | Krakow, Poland                | Western    | Not applicable            |
| Thiruvengadam R (2018) | 2013–2018    | Low      | California                    | Western    | Asymptomatic              |
| Vatn M (1982)          | 1972–1973    | High     | Oslo, Norway                  | Western    | Not applicable            |
| Wong RF (2004)         | 1997–1999    | Moderate | Utah                          | Western    | Symptomatic               |

**Supplementary Table 4.** Findings From Studies Addressing KQ2: What Are Potential Risk Factors Associated With Young-Onset Adenoma? (n = 4 Studies Including 78,880 Individuals)

| Study name      | Study period | Quality  | Location           | Sample size | Indication of colonoscopy                                                                        | Risk factors for YOA                                                                                                                                                                                                                                                                                                                                                                                                                                                                                                                                                                                                   |
|-----------------|--------------|----------|--------------------|-------------|--------------------------------------------------------------------------------------------------|------------------------------------------------------------------------------------------------------------------------------------------------------------------------------------------------------------------------------------------------------------------------------------------------------------------------------------------------------------------------------------------------------------------------------------------------------------------------------------------------------------------------------------------------------------------------------------------------------------------------|
| Chen HM (2011)  | 1990–2009    | Low      | China              | 74,526      | Consecutive subjects 40 y or younger who received colonoscopy for bloody stool                   | Significant risk factors:<br>Rectal bleeding: OR 1.40 (1.03–1.91)<br>Age: OR 1.11 (1.07–1.13)<br>BMI: OR 1.05 (1.01–1.08)<br>Nonsignificant risk factors:<br>Male sex: OR 1.30 (0.95–1.77)                                                                                                                                                                                                                                                                                                                                                                                                                             |
| Chung SJ (2010) | 2004–2007    | Moderate | Seoul, South Korea | 2538        | Asymptomatic screening colonoscopy as part of annual health checkup in patients younger than 50  | Age 30–39 y<br>Significant risk factors:<br>Male sex: OR 2.18 (1.02–4.63)<br>Current smoker: OR 2.05 (1.16–3.65)<br>Nonsignificant risk factors:<br>Alcohol: OR 0.72 (0.35–1.47)<br>Family history of CRC: OR 1.38 (0.55–3.46)<br>BMI >25.0: OR 0.68 (0.31–1.48)<br>Abdominal obesity: OR 1.08 (0.51–2.27)<br>Age 40–49 y<br>Significant risk factors:<br>Male sex: OR 2.09 (1.52–2.87)<br>Current smoker: OR 1.37 (1.06–1.79)<br>Nonsignificant risk factors:<br>BMI ≥25: OR 0.82 (0.61–1.12)<br>Abdominal obesity: OR 1.10 (0.89–1.96)<br>Alcohol: OR 1.01 (0.76–1.33)<br>Family history of CRC: OR 1.38 (0.91–2.09) |
| Gupta AK (2011) | 1999–2009    | Moderate | Michigan           | 640         | Patients aged 40–49 y with FDR with CRC                                                          | Significant risk factors:<br>Age: OR 1.16 (1.03–1.31)<br>Male sex: OR 2.1 (1.06–4.40)<br>Nonsignificant risk factors:<br>FDR >60 y at diagnosis: OR 2.01 (0.94–4.27)<br>Obesity: OR 1.67 (0.80–3.45)<br>Diabetes: OR 0.56 (0.08–3.90)<br>Aspirin: OR 0.26 (0.03–2.30)<br>≥2 FDRs with CRC: OR 1.72 (0.33–8.80)                                                                                                                                                                                                                                                                                                         |
| Lee SE (2016)   | 2012–2014    | Moderate | Goyan, South Korea | 1176        | Patients <50 y undergoing colonoscopy as part of routine health checkups, regardless of symptoms | Significant risk factors:<br>Age (45–49, Ref):<br>Age 40–44: OR 0.64 (0.46–0.88)<br>Age <40: OR 0.39 (0.28–0.56)<br>Waist circumference: OR 1.72 (1.15–2.55)<br>Nonsignificant risk factors:<br>Male sex: OR 1.43 (0.89–2.28)<br>Metabolic syndrome: OR 0.88 (0.53–1.46)<br>BMI (18.5–24.9, Ref):<br>25.0–29.9: OR 0.90 (0.61–1.33)<br>≥30: OR 0.55 (0.24–1.27)<br>Diabetes mellitus: OR 1.29 (0.71–2.35)<br>Current alcohol: 1.04 (0.77–1.40)<br>Smoking status (Never, Ref):<br>Former: 1.23 (0.79–1.93)<br>Current: 1.60 (1.07–2.41)                                                                                |

ADR, adenoma detection rate; BMI, body mass index; CRC, colorectal cancer; FDR, first-degree relative; GI, gastrointestinal; IBD, inflammatory bowel disease; KQ, key question; OR, odds ratio; Ref, reference group; YOA, young-onset adenoma.

**Supplementary Table 5.** Findings From Studies Addressing KQ3: Among Patients With Young-Onset Adenoma, What Is the Risk for Advanced Neoplasia on Follow-up? (n = 4 Studies Including 9341 Individuals)

| Study name                 | Study period                                                | Quality  | Location                      | Number of patients | Mean follow-up time | Risk for advanced neoplasia on follow-up                                                                                                                                        |
|----------------------------|-------------------------------------------------------------|----------|-------------------------------|--------------------|---------------------|---------------------------------------------------------------------------------------------------------------------------------------------------------------------------------|
| Kim HG (2018)              | 2006–2010 for baseline exam and up to 2015 for surveillance | Moderate | Guangdong, Seoul, South Korea | 1132               | Not reported        | High risk adenoma at baseline:<br>3-y rate: 3.9% (n = 13/334)<br>Low risk adenoma at baseline:<br>5-y rate: 4.9% (n = 39/798)                                                   |
| Kim NH (2018) <sup>a</sup> | 2010–2014 for baseline exam and up to 2017 for surveillance | Moderate | Seoul and Suwon, South Korea  | 7848               | 40.8 mo             | Low risk adenoma at baseline:<br>5-y cumulative rate:<br>30–39: 2.8%<br>40–49: 3.3%<br><br>High risk adenoma at baseline:<br>3-y cumulative rate:<br>30–39: 1.9%<br>40–49: 3.6% |
| Nagpal SJ (2018)           | 1984–2012                                                   | Moderate | Cleveland, OH                 | 128                | 33.6 mo             | Advanced neoplasia 7.0% (n = 9/128)                                                                                                                                             |
| Park SK (2015)             | 2009–2012                                                   | Moderate | Seoul, South Korea            | 233                | 49.0 mo             | Advanced neoplasia 7.7% (n = 18/233)                                                                                                                                            |

NOTE. Low risk adenoma at baseline defined as having 1–2 tubular adenomas measuring <10 mm in size. High risk adenoma at baseline defined as having advanced adenomas or ≥3 adenomas.  
KQ, Key question.

<sup>a</sup>Not included in pooled estimate, as reported cumulative risk of metachronous adenoma, and did not provide a denominator for our pooled estimate.

2379  
2380  
2381  
2382  
2383  
2384  
2385  
2386  
2387  
2388  
2389  
2390  
2391  
2392  
2393  
2394  
2395  
2396  
2397  
2398  
2399  
2400  
2401  
2402  
2403  
2404  
2405  
2406  
2407  
2408  
2409  
2410  
2411  
2412  
2413  
2414  
2415  
2416  
2417  
2418  
2419  
2420  
2421  
2422  
2423  
2424  
2425  
2426  
2427  
2428  
2429  
2430  
2431  
2432  
2433  
2434  
2435  
2436

2321  
2322  
2323  
2324  
2325  
2326  
2327  
2328  
2329  
2330  
2331  
2332  
2333  
2334  
2335  
2336  
2337  
2338  
2339  
2340  
2341  
2342  
2343  
2344  
2345  
2346  
2347  
2348  
2349  
2350  
2351  
2352  
2353  
2354  
2355  
2356  
2357  
2358  
2359  
2360  
2361  
2362  
2363  
2364  
2365  
2366  
2367  
2368  
2369  
2370  
2371  
2372  
2373  
2374  
2375  
2376  
2377  
2378

**Supplementary Table 6.** Findings From Studies Addressing KQ4: Among Patients With Young-Onset Adenoma, What Is the Risk for Subsequent Colorectal Cancer? (n = 4 Studies Including 9341 Individuals)

| Study name       | Study period                                                | Quality  | Location                      | Number of patients | Mean follow-up time | Rate of subsequent colorectal cancer                                                                                                                |
|------------------|-------------------------------------------------------------|----------|-------------------------------|--------------------|---------------------|-----------------------------------------------------------------------------------------------------------------------------------------------------|
| Kim HG (2018)    | 2006–2010 for baseline exam and up to 2015 for surveillance | Moderate | Guangdong, Seoul, South Korea | 1132               | Not reported        | Low risk adenoma at baseline:<br>5-y risk of CRC: n = 0/798<br>High risk adenoma at baseline:<br>3-y risk of CRC: n = 0/334<br>CRC risk: n = 1/7848 |
| Kim NH (2018)    | 2010–2014 for baseline exam and up to 2017 for surveillance | Moderate | Seoul and Suwon, South Korea  | 7848               | 40.8 mo             | CRC risk: n = 0/128                                                                                                                                 |
| Nagpal SJ (2018) | 1984–2012                                                   | Moderate | Cleveland, OH                 | 128                | 33.6 mo             | CRC risk: n = 0/233                                                                                                                                 |
| Park SK (2015)   | 2009–2012                                                   | Moderate | Seoul, South Korea            | 233                | 49.0 mo             | CRC risk: n = 0/233                                                                                                                                 |

NOTE. Low risk adenoma at baseline defined as having 1–2 tubular adenomas measuring <10 mm in size. High risk adenoma at baseline defined as having advanced adenomas or ≥3 adenomas. CRC, colorectal cancer; KQ, key question.

2500  
2501  
2502  
2503  
2504  
2505  
2506  
2507  
2508  
2509  
2510  
2511  
2512  
2513  
2514  
2515  
2516  
2517  
2518  
2519  
2520  
2521  
2522  
2523  
2524  
2525  
2526  
2527  
2528  
2529  
2530  
2531  
2532  
2533  
2534  
2535  
2536  
2537  
2538  
2539  
2540  
2541  
2542  
2543  
2544  
2545  
2546  
2547  
2548  
2549  
2550  
2551  
2552  
2553  
2554  
2555  
2556  
2557  
2558  
2559  
2560  
2561  
2562

2437  
2438  
2439  
2440  
2441  
2442  
2443  
2444  
2445  
2446  
2447  
2448  
2449  
2450  
2451  
2452  
2453  
2454  
2455  
2456  
2457  
2458  
2459  
2460  
2461  
2462  
2463  
2464  
2465  
2466  
2467  
2468  
2469  
2470  
2471  
2472  
2473  
2474  
2475  
2476  
2477  
2478  
2479  
2480  
2481  
2482  
2483  
2484  
2485  
2486  
2487  
2488  
2489  
2490  
2491  
2492  
2493  
2494  
2495  
2496  
2497  
2498  
2499
